# Supplementary material for: Unveiling lasing mechanism in CsPbBr3 microsphere cavities
Source: Royal Society of Chemistry journal article supplement (doi:10.1039/c8nr09634a), 2019-01-01
Supplement: c8nr09634a1.pdf [file c8nr09634a1.pdf]

*Supporting Information for*

## **Unveiling Lasing Mechanism in CsPbBr<sub>3</sub> Microspheres Cavities**

Wenna Du,<sup>a,#</sup> Shuai Zhang,<sup>a,b,#</sup> Zhiyong Wu,<sup>a,c</sup> Qiuyu Shang,<sup>d</sup> Yang Mi,<sup>a</sup> Jie Chen,<sup>a,b,d</sup>  
Chaochao Qin,<sup>c</sup> Xiaohui Qiu,<sup>a</sup> Qing Zhang,<sup>\*d,e</sup> Xinfeng Liu<sup>\*a</sup>

*<sup>a</sup>CAS Key Laboratory of Standardization and Measurement for Nanotechnology, CAS Center for Excellence in Nanoscience, National Center for Nanoscience and Technology, Beijing 100190, China*

*<sup>b</sup>University of Chinese Academy of Sciences, Beijing 100049, P. R. China*

*<sup>c</sup>College of Physics and Materials Science, Henan Normal University, Xinxiang 453007, P. R. China*

*<sup>d</sup>Department of Materials Science and Engineering, College of Engineering, Peking University, Beijing 100871, China*

*<sup>e</sup>State Key Lab for Mesoscopic Physics, School of Physics, and Collaborative Innovation Center of Quantum Matter, Peking University, Beijing 100871, China*

*#Wenna Du, Shuai Zhang contributed equally to this work.*

*\*Email address: liuxf@nanoctr.cn, q\_zhang@pku.edu.cn*

## **Contents of the Supporting Information:**

**I.** The setup of chemical vapor deposition method

**II.** SEM images of sphere samples with different titled angle

**III.** Estimation of exciton binding energy

**IV.** The power dependent PL

**V.** Temperature-dependent Raman spectra

**VI.** The anharmonic model

**VII.** Time-resolved PL spectroscopy and fitting

**VIII.** The setup of optical measurement system

## I. The setup of chemical vapor deposition method

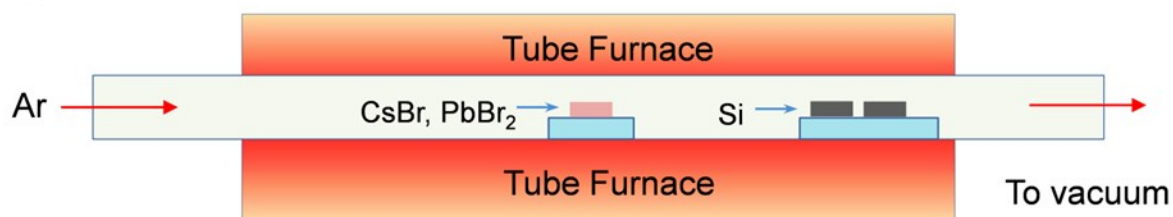

**Figure S1** | Schematic of the chemical vapor deposition method setup

PbBr<sub>2</sub> and CsBr powders (with 1:2 stoichiometry) were placed in the heating center of a quartz tube reactor. The silicon (Si) substrate was positioned at a distance of 12 cm away from the powder sources in the downstream. Ar as the carrier gas is flowing from the upstream to the downstream. At a sample temperature of 575 °C, we observed the reliable growth of CsPbBr<sub>3</sub> perovskite micro-crystals with a special shape of microspheres.

## II. SEM images of sphere samples with different titled angle

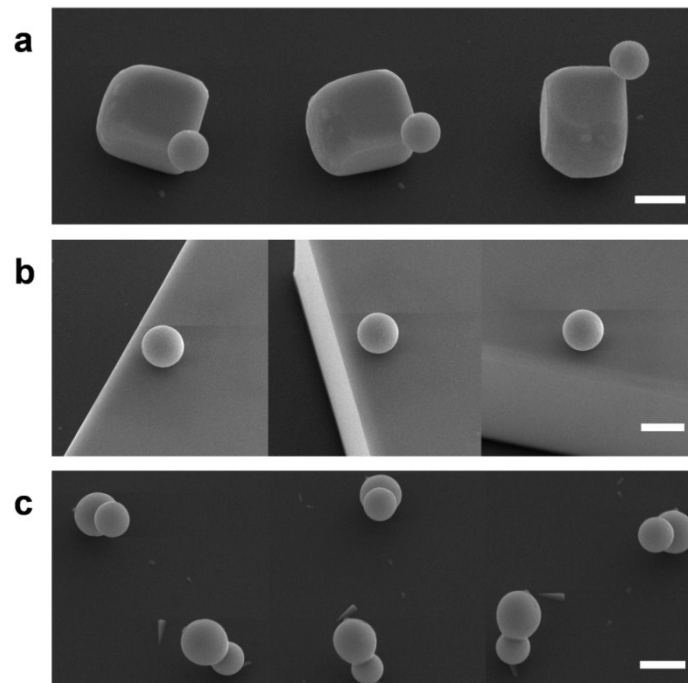

**Figure S2** | SEM images of three sphere samples with different titled angle. The error bar is 1  $\mu\text{m}$ .

### III. Estimation of exciton binding energy

$$I(T) = R \left[ 1 - \exp\left(-\frac{E_b}{k_B T}\right) \right] + c,$$

The exciton binding energy can be fitted using equations,<sup>1-2</sup> where  $I(T)$  is the integrated PL intensity at a specific temperature  $T$ . Therefore, temperature-dependent steady-state PL spectroscopy is conducted on individual CsPbBr<sub>3</sub> microsphere in a backscattering configuration with an excitation laser of 405 nm. The temperature is varied from 77 K to 300 K. The integrated PL intensity versus  $1/T$  of four samples are plotted in **Figure S3** (solid black dots), showing the exciton binding energy from 65 ~ 86 meV. These values are much higher than the thermal disturbance at room temperature ( $KT \sim 26$  meV).

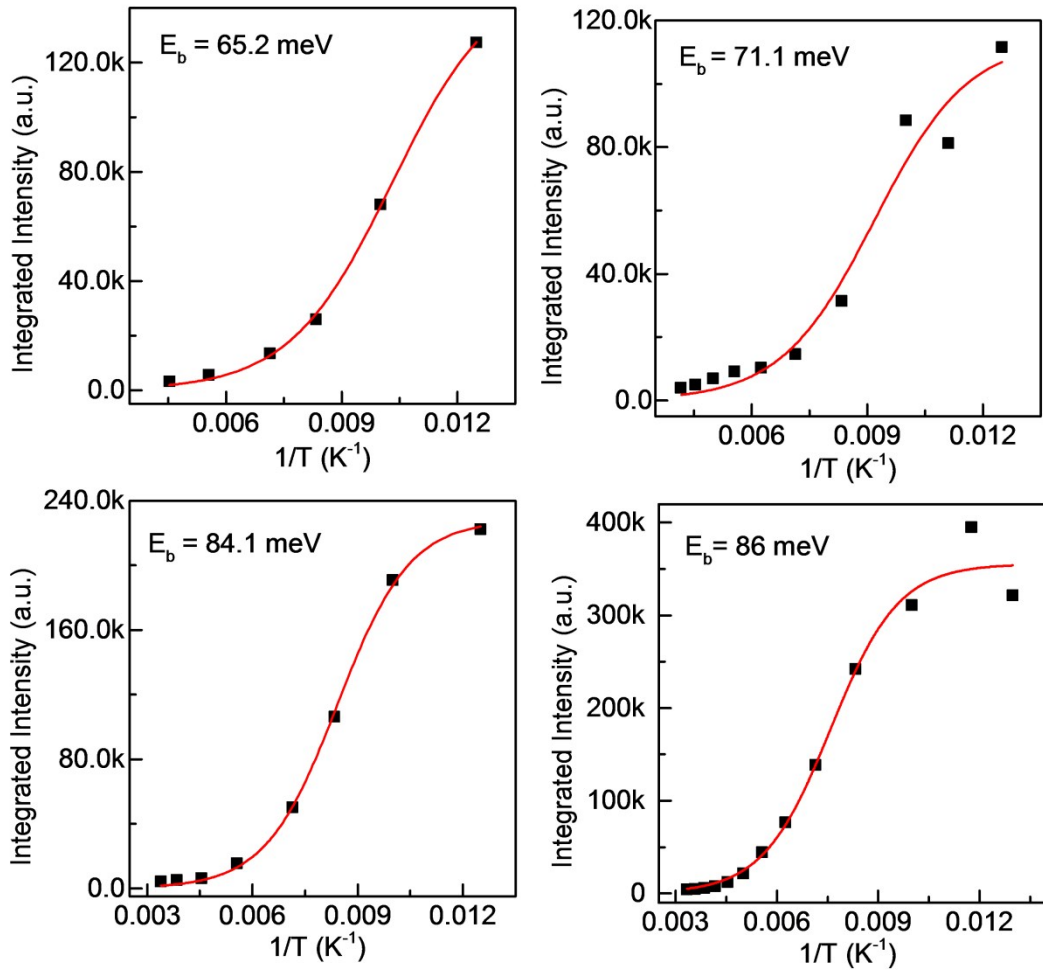

**Figure S3** | The integrated PL intensity of four samples as a function of  $1/T$ . The experimental data are well fitted.

#### IV. The power dependent PL

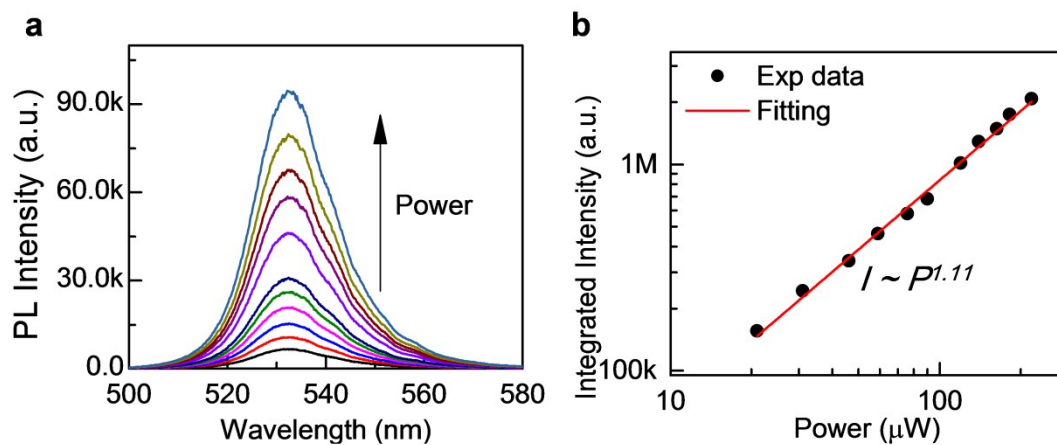

**Figure S4** | (a) PL spectroscopy of CsPbBr<sub>3</sub> microsphere at room temperature with different laser power from 21 μW to 220 μW. (b) PL intensity as a function laser power in a log-log plot. The red line is a power-law fit  $I=P^k$ . Linear fitting of these plots gives a slope of  $1.11 \pm 0.03$ , confirming exciton recombination process in these microspheres.

## V. Temperature-dependent Raman spectra

To confirm the exciton-phonon coupling in sphere microcavities, Raman measurement is executed using 633 nm laser as the excitation source (**Figure S5**). As the CsPbBr<sub>3</sub> microsphere is heated from 103 K to 303 K, the splitting peaks near 70 cm<sup>-1</sup> of the Raman spectra are undistinguishable by degrees.

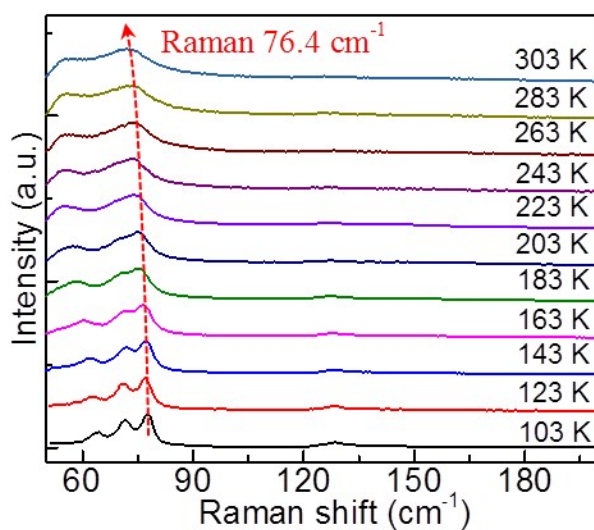

**Figure S5** | Raman spectra of a typical CsPbBr<sub>3</sub> sphere at different temperatures from 103 to 303 K, showing the Raman shift as the temperature changes.

## VI. The anharmonic model

In the anharmonic model, the variation of phonon frequency  $\omega(T)$  and width  $\Gamma(T)$  can be described by an anharmonic expression:

$$\omega(T) = \omega_0 + \Delta(T) \quad (\text{S1})$$

$$\Delta(T) = A \left\{ 1 + \frac{2}{e^x - 1} \right\} + B \left\{ 1 + \frac{3}{e^y - 1} + \frac{3}{(e^y - 1)^2} \right\} \quad (\text{S2})$$

for temperature dependence of wave number at  $76 \text{ cm}^{-1}$ , and

$$\Gamma(T) = C \left\{ 1 + \frac{2}{e^x - 1} \right\} + D \left\{ 1 + \frac{3}{e^y - 1} + \frac{3}{(e^y - 1)^2} \right\} \quad (\text{S3})$$

for temperature dependence of line-width at  $76 \text{ cm}^{-1}$ , where

$$x = \frac{\hbar\omega_0}{2K_B T} \quad (6)$$

$$y = \frac{\hbar\omega_0}{3K_B T} \quad (7)$$

$\omega_0$  is the characteristic frequency of the mode; A, B, C and D are constants.



## VII. Time-resolved PL spectroscopy and fitting

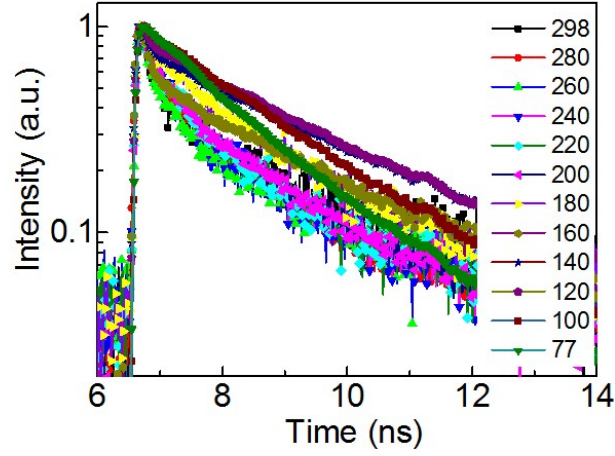

**Figure S6** TRPL decay curves of CsPbBr<sub>3</sub> spheres with different temperatures from 77 K to 298 K monitored around 530 nm with excitation at 400 nm (76 MHz, 120 fs).

The PL decay curve in **Figure S6** can be well fitted by multi-exponential decay equation as follows:

$$I(t) = I_0 + A_1 \cdot e^{-\tau_1/t} + A_2 \cdot e^{-\tau_2/t} \quad (\text{S4})$$

$$T = \frac{A_1 \cdot \tau_1^2 + A_2 \cdot \tau_2^2}{A_1 \cdot \tau_1 + A_2 \cdot \tau_2} \quad (\text{S5})$$

where  $I$ ,  $T$ ,  $\tau_i$ ,  $A_i$  are the integrated PL intensity, average lifetime, lifetime and pre-exponential factors of CsPbBr<sub>3</sub> spheres at different temperature. The fitting results are shown in **Table S1**.

**Table S1** The fitting results by multi-exponential decay equation

|               | 298K | 280K | 260K | 240K | 220K | 200K | 180K | 160K | 140K | 120K | 100K | 77K  |
|---------------|------|------|------|------|------|------|------|------|------|------|------|------|
| $\tau_1$ (ns) | 2.26 | 1.63 | 1.61 | 1.52 | 1.62 | 1.95 | 1.98 | 2.69 | 2.98 | 2.80 | 2.32 | 2.78 |
| $\tau_2$ (ns) | 0.23 | 0.18 | 0.21 | 0.23 | 0.25 | 0.23 | 0.31 | 0.14 | 0.15 | 0.12 | 1.12 | 1.32 |
| $A_1$ (ns)    | 0.19 | 0.26 | 0.19 | 0.28 | 0.25 | 0.26 | 0.19 | 0.27 | 0.37 | 0.24 | 0.10 | 0.13 |
| $A_2$ (ns)    | 0.39 | 0.41 | 0.40 | 0.34 | 0.32 | 0.37 | 0.34 | 0.44 | 0.26 | 0.42 | 0.41 | 0.41 |

## VIII. The setup of optical measurement system

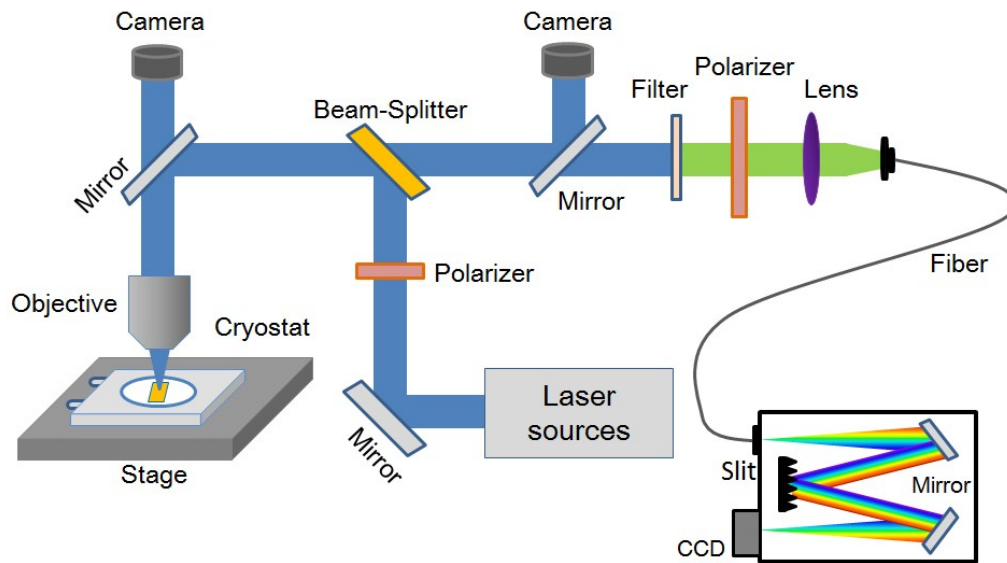

**Figure S7** The setup of optical measurement system. For steady-state PL spectroscopy, a CW laser (wavelength: 405 nm) is focused onto an individual CsPbBr<sub>3</sub> sphere using an Olympus BX51 microscope equipped with a 100× objective (NA = 0.95). PL emission signal was collected by the same microscope objective in a backscattering configuration and analyzed by Princeton Instrument spectrometer (PI Acton, Spectra Pro 2500i) equipped with a TE-cooled charge coupled detector camera (PIXIS-400B). The PL image is recorded by a cool-snap color camera equipped on Olympus BX51 microscope. The PL lifetime measurements were conducted by a time-corrected single photon counting technique (TCSPC) with ultimate temporal resolution of ~40 ps. The excitation laser source is a frequency-doubled mode-locked Ti-sapphire oscillator laser (800 nm, repetition rate 76 MHz, pulse length 120 fs). For lasing measurements, the laser source is generated by frequency doubled from a Coherent Astrella regenerative amplifier (80 fs, 1 kHz, 800 nm) that was seeded by a Coherent Vitara-s oscillator (35 fs, 80 MHz).

### References:

- (1) Chen, Z.; Yu, C.; Kai, S.; Wang, J. J.; Pfenninger, W.; Vockic, N.; Midgley, J.; Kenney, J. T., Photoluminescence study of polycrystalline CsSnI<sub>3</sub> thin films: Determination of exciton binding energy. *J. Lumin.* **2012**, *132*, 345-349.
- (2) Zhang, Q.; Ha, S. T.; Liu, X.; Sum, T. C.; Xiong, Q., Room-Temperature Near-Infrared High-Q Perovskite Whispering-Gallery Planar Nanolasers. *Nano Lett.* **2014**, *14*, 5995-6001.
